# Supplementary material for: Control Mechanisms for Codes of Conduct in Distribution Systems
Source: Royal Society of Chemistry journal article supplement (doi:10.1039/d1fo03541j), 2000-01-01
Supplement: d1fo03541j1.pdf [file d1fo03541j1.pdf]

## **Supporting Information**

**Prevention effects of black soybean polyphenols on non-alcoholic fatty liver disease in three different model mice**

**Mio Yamamoto<sup>a</sup>, Yasukiyo Yoshioka<sup>b,c</sup>, Tomoya Kitakaze<sup>a,d</sup>, Yoko Yamashita<sup>a</sup>, Hitoshi Ashida<sup>a\*</sup>**

**<sup>a</sup> Graduate School of Agricultural Science, Kobe University, Kobe, Hyogo 651-8501, Japan**

**<sup>b</sup> Graduate School of Science, Technology and Innovation, Kobe University, Kobe, Hyogo 657-8501, Japan**

**<sup>c</sup> Graduate School of Integrated Pharmaceutical and Nutritional Sciences, University of Shizuoka, 52-1 Yada, Suruga-ku, Shizuoka, Shizuoka 4228526, Japan.**

**<sup>d</sup> Division of Applied Life Sciences, Graduate School of Life and Environmental Sciences, Osaka Prefecture University, 1-1 Gakuen-cho, Naka-ku, Sakai, Osaka 5998531, Japan**

**Supplementary Table 1A. Composition of the diets for Experiment 1**

| ingredient           | g/100 g diet        |                     |
|----------------------|---------------------|---------------------|
|                      | AIN-93M             | CDAHFD              |
| casein               | 14.0                | 0                   |
| L-cysteine/L-cystine | 0.18                | 0.56                |
| L-methionine         | -                   | 0.11                |
| other amino acid     | -                   | 22.4                |
| cornstarch           | 46.6                | 0                   |
| dextrin/maltodextrin | 15.5                | 17.2                |
| sucrose              | 10.0                | 9.09                |
| soybean oil          | 4.0                 | 3.31                |
| cellulose            | 5.0                 | 6.61                |
| mineral mix          | 3.5                 | 1.32                |
| vitamin mix          | 1                   | 1.32                |
| choline bitartrate   | 0.25                | 0                   |
| lard                 | 0                   | 32.4                |
| others               | 0.0008              | 5.63                |
| energy density       | 348 kcal/100 g diet | 520 kcal/100 g diet |

CDAHFD: choline-deficient and L-amino acid-defined high-fat diet

**Supplementary Table 1B. Composition of the diets for Experiment 2**

| ingredient          | g/100 g diet        |                     |
|---------------------|---------------------|---------------------|
|                     | Control diet        | Western diet        |
| casein, 80 mesh     | 16.3                | 19.5                |
| DL-methionine       | 0.25                | 0.30                |
| corn starch         | 41.8                | 4.99                |
| maltodextrin 10     | 28.9                | 9.99                |
| sucrose             | 0                   | 34                  |
| cellulose, BW200    | 4.18                | 4.99                |
| milk fat, anhydrous | 0                   | 20                  |
| corn oil            | 4.39                | 9.98                |
| ethoxyquin          | 0.003               | 0.004               |
| mineral mix S10001  | 2.92                | 3.50                |
| calcium carbonate   | 0.33                | 0.40                |
| vitamin mix V10001  | 0.84                | 1.00                |
| choline bitartrate  | 0.17                | 0.20                |
| cholesterol         | 0                   | 0.15                |
| energy density      | 391 kcal/100 g diet | 468 kcal/100 g diet |

**Supplementary Table 1C. Composition of the diets for Experiment 3**

| ingredient          | g/100 g diet        |                           |
|---------------------|---------------------|---------------------------|
|                     | Control diet        | Western diet<br>+20% Lard |
| casein, 80 mesh     | 16.3                | 16.3                      |
| DL-methionine       | 0.25                | 0.30                      |
| corn starch         | 41.8                | 4.16                      |
| maltodextrin 10     | 28.9                | 8.28                      |
| sucrose             | 0                   | 28                        |
| cellulose, BW200    | 4.18                | 4.19                      |
| milk fat, anhydrous | 0                   | 16.7                      |
| corn oil            | 4.39                | 0.83                      |
| ethoxyquin          | 0.003               | 0.00                      |
| mineral mix S10001  | 2.92                | 2.89                      |
| calcium carbonate   | 0.33                | 0.30                      |
| vitamin mix V10001  | 0.84                | 0.80                      |
| choline bitartrate  | 0.17                | 0.20                      |
| cholesterol         | 0                   | 0.13                      |
| lard                | 0                   | 16.7                      |
| energy density      | 391 kcal/100 g diet | 547 kcal/100 g diet       |

**Supplementary Table 2. Changes in the body weight, food intake, and serum and hepatic lipid contents in Experiment 1**

| <i>3 weeks</i>                  | BE (%) | AIN93M                 |                        | CDAHFD                 |                        |
|---------------------------------|--------|------------------------|------------------------|------------------------|------------------------|
|                                 |        | 0                      | 0                      | 1.0                    | 2.0                    |
| Initial body wt (g)             |        | 21.2±0.4               | 21.2±0.5               | 20.8±0.4               | 20.9±0.4               |
| Final body wt (g)               |        | 22.7±0.6 <sup>a</sup>  | 19.4±0.4 <sup>b</sup>  | 19±0.4 <sup>b</sup>    | 18.7±0.4 <sup>b</sup>  |
| Food intake (g/head)            |        | 2.54±0.19 <sup>a</sup> | 1.95±0.05 <sup>b</sup> | 2.00±0.06 <sup>b</sup> | 2.10±0.08 <sup>b</sup> |
| Plasma triglyceride (mg/dl)     |        | 113±19 <sup>a</sup>    | 69±6 <sup>a</sup>      | 84±16 <sup>a</sup>     | 107±15 <sup>a</sup>    |
| Plasma cholesterol (mg/dl)      |        | 88±6 <sup>a</sup>      | 68±4 <sup>a</sup>      | 91±15 <sup>a</sup>     | 73±8 <sup>a</sup>      |
| Liver weight (g/100g body wt)   |        | 4.10±0.30 <sup>a</sup> | 7.88±0.14 <sup>b</sup> | 8.00±0.37 <sup>b</sup> | 8.40±0.22 <sup>b</sup> |
| Liver total lipids (mg/g liver) |        | 64.7±7.9 <sup>a</sup>  | 229±12 <sup>b</sup>    | 209±18 <sup>b</sup>    | 254±13 <sup>b</sup>    |
| <i>6 weeks</i>                  | BE (%) | AIN93M                 |                        | CDAHFD                 |                        |
|                                 |        | 0                      | 0                      | 1.0                    | 2.0                    |
| Initial body wt (g)             |        | 18.8±0.4               | 18.7±0.6               | 19.0±0.4               | 18.8±0.7               |
| Final body wt (g)               |        | 29.0±0.8 <sup>a</sup>  | 19.2±0.3 <sup>b</sup>  | 20.3±0.5 <sup>b</sup>  | 19.8±0.6 <sup>b</sup>  |
| Food intake (g/head)            |        | 2.68±0.16 <sup>a</sup> | 1.65±0.04 <sup>b</sup> | 1.90±0.04 <sup>b</sup> | 1.86±0.05 <sup>b</sup> |
| Plasma triglyceride (mg/dl)     |        | 112±6 <sup>a</sup>     | 71±6 <sup>b</sup>      | 64±5 <sup>b</sup>      | 64±9 <sup>b</sup>      |
| Plasma cholesterol (mg/dl)      |        | 79±13 <sup>a</sup>     | 24±3 <sup>b</sup>      | 22±4 <sup>b</sup>      | 21±2 <sup>b</sup>      |
| Liver weight (g/100g body wt)   |        | 4.82±0.22 <sup>a</sup> | 9.62±0.20 <sup>b</sup> | 10.3±0.15 <sup>b</sup> | 10.3±0.22 <sup>b</sup> |
| Liver total lipids (mg/g liver) |        | 72.4±12.4 <sup>a</sup> | 134±7 <sup>b</sup>     | 150±6 <sup>b</sup>     | 170±14 <sup>b</sup>    |
| <i>12 weeks</i>                 | BE (%) | AIN93M                 |                        | CDAHFD                 |                        |
|                                 |        | 0                      | 0                      | 1.0                    | 2.0                    |
| Initial body wt (g)             |        | 18.5±0.5               | 18.8±0.6               | 18.6±0.5               | 18.5±0.4               |
| Final body wt (g)               |        | 33.4±0.9 <sup>a</sup>  | 21.3±0.2 <sup>b</sup>  | 21.3±0.3 <sup>b</sup>  | 20.4±0.2 <sup>b</sup>  |
| Food intake (g/head)            |        | 2.65±0.11 <sup>a</sup> | 1.81±0.04 <sup>b</sup> | 1.90±0.03 <sup>b</sup> | 1.79±0.03 <sup>b</sup> |
| Plasma triglyceride (mg/dl)     |        | 87±7 <sup>a</sup>      | 47±7 <sup>b</sup>      | 50±6 <sup>b</sup>      | 56±4 <sup>b</sup>      |
| Plasma cholesterol (mg/dl)      |        | 105±12 <sup>a</sup>    | 15±7 <sup>b</sup>      | 10±1 <sup>b</sup>      | 11±3 <sup>b</sup>      |
| Liver weight (g/100g body wt)   |        | 4.34±0.24 <sup>a</sup> | 9.83±0.18 <sup>b</sup> | 10.4±0.41 <sup>b</sup> | 10.7±0.25 <sup>b</sup> |
| Liver total lipids (mg/g liver) |        | 99.6±3.7 <sup>a</sup>  | 140±6 <sup>b</sup>     | 143±6 <sup>b</sup>     | 135±2 <sup>b</sup>     |

The results are represented as the mean ± SE (n = 5). Values without a common letter differ significantly among groups ( $p < 0.05$ , Tukey-Kramer multiple-comparison test).

**Supplementary Table 3. Changes in the body weight, food intake, white adipose tissue weight, and serum lipid contents in Experiment 2**

|                                                | Control                | WD                     | WD+0.02%EC             | WD+0.1%EC                           | WD+2.0%BE                           |
|------------------------------------------------|------------------------|------------------------|------------------------|-------------------------------------|-------------------------------------|
| Initial body wt (g)                            | 17.7±0.7               | 18.1±0.7               | 18.1±0.6               | 18.1±0.7                            | 18.2±0.8                            |
| Final body wt (g)                              | 25.7±0.9 <sup>a</sup>  | 34.1±1.6 <sup>b</sup>  | 36.2±1.6 <sup>b</sup>  | 34.9±1.1 <sup>b</sup>               | 31.0±0.9 <sup>b</sup>               |
| Food intake (g/head)                           | 2.22±0.07              | 2.32±0.06              | 2.32±0.04              | 2.33±0.05                           | 2.15±0.03                           |
| Total white adipose tissue wt (g/100g body wt) | 8.8±0.8 <sup>a</sup>   | 20.3±1.6 <sup>b</sup>  | 20.6±1.6 <sup>b</sup>  | 18.2±1.4 <sup>b</sup> <sup>c</sup>  | 12.3±1.8 <sup>a</sup> <sup>c</sup>  |
| Epididymal (g/100g body wt)                    | 2.19±0.16 <sup>a</sup> | 4.62±0.28 <sup>b</sup> | 4.70±0.13 <sup>b</sup> | 4.76±0.50 <sup>b</sup>              | 3.43±0.38 <sup>a</sup> <sup>b</sup> |
| Mesenteric (g/100g body wt)                    | 0.94±0.09 <sup>a</sup> | 2.13±0.18 <sup>b</sup> | 2.17±0.18 <sup>b</sup> | 2.01±0.09 <sup>b</sup>              | 1.31±0.19 <sup>a</sup>              |
| Perirenal (g/100g body wt)                     | 0.92±0.09 <sup>a</sup> | 2.18±0.07 <sup>b</sup> | 2.21±0.09 <sup>b</sup> | 1.91±0.19 <sup>b</sup> <sup>c</sup> | 1.55±0.21 <sup>c</sup>              |
| Subcutaneous (g/100g body wt)                  | 4.70±0.54 <sup>a</sup> | 11.4±1.10 <sup>b</sup> | 11.5±1.42 <sup>b</sup> | 9.52±0.90 <sup>b</sup> <sup>c</sup> | 5.97±1.12 <sup>a</sup> <sup>c</sup> |
| Liver wt (g/100g body wt)                      | 4.54±0.23              | 5.29±0.37              | 4.60±0.27              | 4.20±0.24                           | 4.26±0.16                           |
| Liver total lipids (mg/g liver)                | 119±5 <sup>a</sup>     | 161±12 <sup>b</sup>    | 145±5 <sup>a</sup>     | 149±3 <sup>a</sup>                  | 128±11 <sup>a</sup>                 |
| Plasma triglyceride (mg/dl)                    | 107±7                  | 94±7                   | 96±7                   | 84±11                               | 95±6                                |
| Plasma cholesterol (mg/dl)                     | 99±4 <sup>a</sup>      | 208±3 <sup>b</sup>     | 184±9 <sup>b</sup>     | 189±5 <sup>b</sup>                  | 150±6 <sup>a</sup>                  |

The results are represented as the mean ± SE (n = 5). Values without a common letter differ significantly among groups ( $p < 0.05$ , Tukey-Kramer multiple-comparison test).

**Supplementary Table 4. Changes in the body weight, food intake, white adipose tissue weight, and serum lipid contents in Experiment 3**

|                                                      | Corn Oil                |                         |                         |                         | CCl <sub>4</sub>        |                          |                          |                         |
|------------------------------------------------------|-------------------------|-------------------------|-------------------------|-------------------------|-------------------------|--------------------------|--------------------------|-------------------------|
|                                                      | Control                 | WD                      | WD<br>+1.0%BE           | WD<br>+2.0%BE           | Control                 | WD                       | WD<br>+1.0%BE            | WD<br>+2.0%BE           |
| Initial body wt (g)                                  | 17.3±0.6                | 16.7±0.8                | 17.3±0.6                | 17.3±0.5                | 17.3±0.6                | 17.0±0.8                 | 17.3±0.5                 | 17.3±0.5                |
| Final body wt (g)                                    | 24.3±0.9 <sup>d</sup>   | 32.2±0.6 <sup>a</sup>   | 30.3±0.3 <sup>ab</sup>  | 27.0±0.9 <sup>bcd</sup> | 25.0±0.3 <sup>cd</sup>  | 28.3±0.8 <sup>bc</sup>   | 27.2±1.4 <sup>bcd</sup>  | 26.6±0.9 <sup>cd</sup>  |
| Food intake<br>(g/head)                              | 2.20±0.08 <sup>ab</sup> | 1.96±0.06 <sup>bc</sup> | 1.85±0.04 <sup>c</sup>  | 1.96±0.05 <sup>bc</sup> | 2.36±0.07 <sup>a</sup>  | 2.04±0.09 <sup>bc</sup>  | 1.87±0.05 <sup>c</sup>   | 1.85±0.05 <sup>c</sup>  |
| Total white adipose<br>tissue wt<br>(g/100g body wt) | 10.2±1.1 <sup>d</sup>   | 21.2±1.01 <sup>1a</sup> | 19.1±1.1 <sup>ab</sup>  | 12.3±1.0 <sup>cd</sup>  | 10.2±1.4 <sup>d</sup>   | 15.8±1.3 <sup>bc</sup>   | 16.2±1.9 <sup>abc</sup>  | 15.0±1.1 <sup>bcd</sup> |
| Epididymal<br>(g/100g body wt)                       | 2.46±0.19 <sup>d</sup>  | 5.36±0.24 <sup>a</sup>  | 4.59±0.19 <sup>ab</sup> | 3.25±0.30 <sup>cd</sup> | 2.22±0.26 <sup>d</sup>  | 4.22±0.20 <sup>abc</sup> | 4.32±0.51 <sup>abc</sup> | 4.01±0.35 <sup>bc</sup> |
| Mesenteric<br>(g/100g body wt)                       | 1.26±0.12 <sup>ab</sup> | 1.85±0.16 <sup>a</sup>  | 1.67±0.12 <sup>ab</sup> | 1.13±0.14 <sup>b</sup>  | 1.44±0.16 <sup>ab</sup> | 1.41±0.10 <sup>ab</sup>  | 1.53±0.23 <sup>ab</sup>  | 1.31±0.07 <sup>ab</sup> |
| Perirenal<br>(g/100g body wt)                        | 0.94±0.11 <sup>cd</sup> | 2.44±0.08 <sup>a</sup>  | 2.22±0.12 <sup>a</sup>  | 1.40±0.14 <sup>bc</sup> | 0.82±0.11 <sup>d</sup>  | 1.55±0.12 <sup>b</sup>   | 1.52±0.16 <sup>b</sup>   | 1.52±0.08 <sup>b</sup>  |
| Subcutaneous<br>(g/100g body wt)                     | 5.59±0.67 <sup>b</sup>  | 11.5±0.61 <sup>a</sup>  | 10.6±0.81 <sup>a</sup>  | 6.50±0.47 <sup>b</sup>  | 5.74±0.88 <sup>b</sup>  | 8.65±0.90 <sup>ab</sup>  | 8.83±1.07 <sup>ab</sup>  | 8.16±0.69 <sup>ab</sup> |
| Plasma triglyceride<br>(mg/dl)                       | 110±9 <sup>a</sup>      | 78±5 <sup>ab</sup>      | 64±4 <sup>b</sup>       | 74±4 <sup>ab</sup>      | 89±13 <sup>ab</sup>     | 95±7 <sup>ab</sup>       | 78±13 <sup>ab</sup>      | 69±9 <sup>b</sup>       |
| Plasma cholesterol<br>(mg/dl)                        | 100±6 <sup>c</sup>      | 147±9 <sup>a</sup>      | 136±7 <sup>ab</sup>     | 110±3 <sup>bc</sup>     | 90±5 <sup>c</sup>       | 99±8 <sup>c</sup>        | 122±15 <sup>abc</sup>    | 110±6 <sup>bc</sup>     |

The results are represented as the mean ± SE (n = 5). Values without a common letter differ significantly among groups ( $p < 0.05$ , Tukey-Kramer multiple-comparison test).
